# Supplementary material for: Rapid biosensor development using plant hormone receptors as reprogrammable scaffolds
Source: PubMed Central journal article supplement (PMC9750858; doi:10.1038/s41587-022-01364-5), 2022-06-20
Supplement: 41587_2022_1364_MOESM2_ESM.pdf [file 41587_2022_1364_MOESM2_ESM.pdf]

## Reporting Summary

Nature Portfolio wishes to improve the reproducibility of the work that we publish. This form provides structure for consistency and transparency in reporting. For further information on Nature Portfolio policies, see our [Editorial Policies](#) and the [Editorial Policy Checklist](#).

### Statistics

For all statistical analyses, confirm that the following items are present in the figure legend, table legend, main text, or Methods section.

n/a Confirmed

- The exact sample size ( $n$ ) for each experimental group/condition, given as a discrete number and unit of measurement
- A statement on whether measurements were taken from distinct samples or whether the same sample was measured repeatedly
- The statistical test(s) used AND whether they are one- or two-sided  
*Only common tests should be described solely by name; describe more complex techniques in the Methods section.*
- A description of all covariates tested
- A description of any assumptions or corrections, such as tests of normality and adjustment for multiple comparisons
- A full description of the statistical parameters including central tendency (e.g. means) or other basic estimates (e.g. regression coefficient) AND variation (e.g. standard deviation) or associated estimates of uncertainty (e.g. confidence intervals)
- For null hypothesis testing, the test statistic (e.g.  $F$ ,  $t$ ,  $r$ ) with confidence intervals, effect sizes, degrees of freedom and  $P$  value noted  
*Give  $P$  values as exact values whenever suitable.*
- For Bayesian analysis, information on the choice of priors and Markov chain Monte Carlo settings
- For hierarchical and complex designs, identification of the appropriate level for tests and full reporting of outcomes
- Estimates of effect sizes (e.g. Cohen's  $d$ , Pearson's  $r$ ), indicating how they were calculated

*Our web collection on [statistics for biologists](#) contains articles on many of the points above.*

### Software and code

Policy information about [availability of computer code](#)

Data collection BD Accuri C6+ analysis software or FlowJo software were used to collect flow cytometry data. No custom code was used to collect data.

Data analysis Statistical analysis for all graphical data presented was performed on Graphpad Prism version 9.0. Custom scripts were used for deep sequencing data analysis; these scripts are available on Zenodo under DOI: 10.5281/zenodo.6493839

For manuscripts utilizing custom algorithms or software that are central to the research but not yet described in published literature, software must be made available to editors and reviewers. We strongly encourage code deposition in a community repository (e.g. GitHub). See the Nature Portfolio [guidelines for submitting code & software](#) for further information.

### Data

Policy information about [availability of data](#)

All manuscripts must include a [data availability statement](#). This statement should provide the following information, where applicable:

- Accession codes, unique identifiers, or web links for publicly available datasets
- A description of any restrictions on data availability
- For clinical datasets or third party data, please ensure that the statement adheres to our [policy](#)

Accession code for the WIN-PYL2WIN-HAB1T+ structure is listed as 7MWN. Libraries will be made available through AddGene pending University approval.

## Field-specific reporting

Please select the one below that is the best fit for your research. If you are not sure, read the appropriate sections before making your selection.

Life sciences       Behavioural & social sciences       Ecological, evolutionary & environmental sciences

For a reference copy of the document with all sections, see [nature.com/documents/nr-reporting-summary-flat.pdf](https://www.nature.com/documents/nr-reporting-summary-flat.pdf)

## Life sciences study design

All studies must disclose on these points even when the disclosure is negative.

|                 |                                                                                                                                                                                                                                                                                |
|-----------------|--------------------------------------------------------------------------------------------------------------------------------------------------------------------------------------------------------------------------------------------------------------------------------|
| Sample size     | No sample size calculations were performed. The sample size (n) of each experiment is provided in the corresponding figure captions or methods section in the main manuscript and supplementary information files. Sample sizes were chosen to support meaningful conclusions. |
| Data exclusions | No data were excluded                                                                                                                                                                                                                                                          |
| Replication     | All data are presented in biological duplicate or triplicate as noted in the figure legends.                                                                                                                                                                                   |
| Randomization   | The work does not involve participant groups; therefore, randomization was not relevant the study.                                                                                                                                                                             |
| Blinding        | The work does not involve participant groups, therefore, blinding was not relevant to the study.                                                                                                                                                                               |

## Reporting for specific materials, systems and methods

We require information from authors about some types of materials, experimental systems and methods used in many studies. Here, indicate whether each material, system or method listed is relevant to your study. If you are not sure if a list item applies to your research, read the appropriate section before selecting a response.

### Materials & experimental systems

| n/a                                 | Involved in the study                                  |
|-------------------------------------|--------------------------------------------------------|
| <input type="checkbox"/>            | <input checked="" type="checkbox"/> Antibodies         |
| <input checked="" type="checkbox"/> | <input type="checkbox"/> Eukaryotic cell lines         |
| <input checked="" type="checkbox"/> | <input type="checkbox"/> Palaeontology and archaeology |
| <input checked="" type="checkbox"/> | <input type="checkbox"/> Animals and other organisms   |
| <input checked="" type="checkbox"/> | <input type="checkbox"/> Human research participants   |
| <input checked="" type="checkbox"/> | <input type="checkbox"/> Clinical data                 |
| <input checked="" type="checkbox"/> | <input type="checkbox"/> Dual use research of concern  |

### Methods

| n/a                                 | Involved in the study                              |
|-------------------------------------|----------------------------------------------------|
| <input checked="" type="checkbox"/> | <input type="checkbox"/> ChIP-seq                  |
| <input type="checkbox"/>            | <input checked="" type="checkbox"/> Flow cytometry |
| <input checked="" type="checkbox"/> | <input type="checkbox"/> MRI-based neuroimaging    |

## Antibodies

|                 |                                                                                                                                                                                                                                                                                                                                                                                             |
|-----------------|---------------------------------------------------------------------------------------------------------------------------------------------------------------------------------------------------------------------------------------------------------------------------------------------------------------------------------------------------------------------------------------------|
| Antibodies used | anti-cmyc FITC was used for yeast surface display measurements in Figure S4. Details of this reagent are provided in the materials section of the supporting information.                                                                                                                                                                                                                   |
| Validation      | anti-cmyc FITC (part no. 130-116-653 used in these studies) was validated as described by the commercial vendor here -- <a href="https://www.miltenyibiotec.com/US-en/products/c-myc-antibody-anti-human-mouse-rat-sh1-26e7-1-3.html#fitc:30-tests-in-60-ul">https://www.miltenyibiotec.com/US-en/products/c-myc-antibody-anti-human-mouse-rat-sh1-26e7-1-3.html#fitc:30-tests-in-60-ul</a> |

## Flow Cytometry

### Plots

Confirm that:

- The axis labels state the marker and fluorochrome used (e.g. CD4-FITC).
- The axis scales are clearly visible. Include numbers along axes only for bottom left plot of group (a 'group' is an analysis of identical markers).
- All plots are contour plots with outliers or pseudocolor plots.
- A numerical value for number of cells or percentage (with statistics) is provided.

### Methodology

|                    |                                                                                                                              |
|--------------------|------------------------------------------------------------------------------------------------------------------------------|
| Sample preparation | The cells were washed with 1 mL PBS buffer twice and resuspended in 1 mL DI water for flow cytometry analysis. For analysis, |
|--------------------|------------------------------------------------------------------------------------------------------------------------------|

|                           |                                                                                                                                                                                                                                                                                                                                                                            |
|---------------------------|----------------------------------------------------------------------------------------------------------------------------------------------------------------------------------------------------------------------------------------------------------------------------------------------------------------------------------------------------------------------------|
| Sample preparation        | 50 $\mu$ L of resuspended cells were transferred to a 96-well plate with flat bottom, adding DI water up to a final volume of 200 $\mu$ L.                                                                                                                                                                                                                                 |
| Instrument                | Samples were analyzed using either a BD Accuri C6+ flow cytometry or Sony Biotech SH800.                                                                                                                                                                                                                                                                                   |
| Software                  | Samples were analyzed using either BD Accuri C6+ analysis software or FlowJo software.                                                                                                                                                                                                                                                                                     |
| Cell population abundance | At least 10,000 cells were analyzed in each experiment, gating data is shown in the supporting information.                                                                                                                                                                                                                                                                |
| Gating strategy           | The standard gating for yeast measurements has been adequately described in previous publications, e.g., Medina-Cucurella A and Whitehead TA (2018) "Characterizing Protein-Protein Interactions Using Deep Sequencing Coupled to Yeast Surface Display", Methods in Molecular Biology in Protein Complex Assembly, 101-121.; the full gating strategy is shown in the SI. |

Tick this box to confirm that a figure exemplifying the gating strategy is provided in the Supplementary Information.
