# Supplementary material for: Rapid biosensor development using plant hormone receptors as reprogrammable scaffolds
Source: Nat Biotechnol. 2022 Jun 20;40(12):1855–61. doi: 10.1038/s41587-022-01364-5 (PMC9750858; doi:10.1038/s41587-022-01364-5)
Supplement: Supplementary file 3 — Sequence validation of mutagenic libraries and list of primers and plasmids used. [file 41587_2022_1364_MOESM3_ESM.xlsx]

## Sheet: Minimum DDG InRosetta
Minimum ΔΔG in Rosetta Energy Units (REU) predicted by Rosetta for each candidate mutation in the library. Mutations to cysteine or proline were excluded.

## Sheet: Design of PYR1 DSM Library
Design of the PYR1 double mutant pocket library. This library encodes a total of 42,743 double mutants, of which 35,822 are distant mutations (separated by at least eight amino acids) and 6, 921 are proximate mutations (separated by fewer than eight amino acids).
Position	WT	Amino Acids
59	K	ADEFGHIKLMNQRSTVWY
62	I	ILRVY
81	V	ILMRTVY
83	V	ADEFGHIKLMNQRSTVWY
87	L	AFGILMVWY
89	A	ADEFGHIKLMNQRSTVWY
92	S	ADEFGHIKLMNQRSTVWY
94	E	ADEFGHIKLMNQRSTVWY
108	F	ADEFGHIKLMNQRSTVWY
110	I	AFIKLMRTVW
117	L	ADEFGHIKLMNQRSTVWY
120	Y	ADEFGHIKLMNQRSTVWY
122	S	ADEFGHIKLMNQRSTVWY
141	E	ADEFGHIKLMNQRSTVWY
159	F	ADEFGHIKLMNQRSTVWY
160	A	ADEFGHIKLMNQRSTVWY
163	V	ADEFGHIKLMNQRSTVWY
164	V	ADEFGHIKLMNQRSTVWY
167	N	ADEFGHIKLMNQRSTVWY

## Sheet: PYR1 DSM library coverage stat
Composition of the proximate and distant double mutant libraries is shown. Library encoded variants are any for which all mutations in a variant were encoded in the library. Quintuple and higher mutants present at very low frequencies are omitted for clarity. Other variants are those with at least one mutation not encoded. Coverage is shown for the target set of double mutants for each library (6…
		Proximate		Distant
		(L0007)		(L0008)
Quality filtered reads		1397492		5461353
Library composition (%)
Wild-type		34.29		9.29
Library encoded
single		5.45		41.68
double		50.39		36.94
triple		0.63		3.69
quadruple		1.44		0.17
Other		7.77		8.22
Observed / Encoded double mutants		6920 / 6921		35,748 / 35,822
Coverage (%)		99.99		99.79

## Sheet: HAB1T+ stability 
Protein function and stability parameters for HAB1-636 (WT), and the designs ΔN-HAB1T+ and 724-726 from 2 independent expression and purification experiments, with three technical replicates for each parameter. Phosphatase activity is reported as the percentage of the activity found for HAB1-636 using 42.86 mM p-NPP, with error reported as 1 SEM. Thermal stability, as measured using Tm,app, is re…
	6xHis-MBP-ΔN-HAB1 variant - Biorep 1	6xHis-MBP-ΔN-HAB1 variant - Biorep 2
	WT (636)	T+ (723)	724	725	726	WT (636)	T+ (723)	724	725	726
Phosphatase Activity (% of 636 at 50 mM p-NPP)	100 ± 0.4	0.21 ± 0.02	0.22 ± 0.005	0.25 ± 0.01	0.27 ± 0.005	100 ± 0.8	0.04 ± 0.005	0.01 ± 0.001	0.003 ± 0.004	0.03 ± 0.01
Tm,app (°C)	44.8 [43.6,undef]	54.4 [54.06,54.72]	54.1 [53.73,54.50]	50.7 [50.45,51.18]	50.5 [50.00,51.03]	38.1 [38.03,38.21]	44.2 [43.98,44.52]	44.8 [44.53,44.99]	45.5 [45.16,45.94]	44.0 [43.36,44.66]
KD2 (nM)	2.53 [2.31,2.76]	2.13 [1.94,2.32]	3.33 [3.10,3.58]	1.65 [1.52,1.76]	2.37 [2.24,2.51]	5.01 [4.47,5.62]	4.76 [4.18,5.42]	6.49 [5.83,7.23]	4.66 [3.55,6.01]	6.3 [5.15,7.71]

## Sheet: ELISA parameters for PYR1
Global parameters for the PYR1M/ABA/ΔN-HAB1T+ system in the context of a plate-based ELISA assay for three independent biological replicates.
	Biorep 1	Biorep 2	Biorep 3
Amax [AU 450 nm]	2	2.8	2
KD1 [nM]	820	780	2090
KD2 [nM]	8	4	2

## Sheet: PYR1 K59 SSM library coverage
PYR1 K59R SSM library statistics, this newly constructed library was used to screen for organophosphate receptors along with the DSM library (described in the main text) and the previously constructed DMC library (Medina-Cucurella et al. 2019).

## Sheet: On and off- target responses
On and off-target responses of PYR1DIAZI and PYR1PIRI. Data shown are results of the EC50 calculations for each sensor. The on-target ligand results are shown in bold, while off-target results are shown in normal text. EC50 fits were done using the four-parameter EC50 calculation within Prism Graphpad.

## Sheet: Primers used 
Name	Sequence
PJS-P2062	TTGGAATTTAATCGCGGCCT
PJS-P2063	TTCAACGGGAAACGTCTTGCT
PJS-P2079	CATAATGGGATGGAGTCCAGCTCGTAGACGCT
PJS-P2080	ACGAGCTGGACTCCATCCCATTATGGGGAACT
PJS-P2081	ACGCTTAGACAATTCATCTTTAATACGTTCAATCTC
PJS-P2082	TATTAAAGATGAATTGTCTAAGCGTAACACCGGGGA
PJS-P2112	CTCGTATGAGACCGTGTTACAACCAATTAACCAATTC
PJS-P2113	TTGACCAGATGAGACCACGGTTATCCACAGAATCA
PJS-P2114	GGATAACCGTGGTCTCATCTGGTCAATCGTACGAC
PJS-P2115	TGGTTGTAACACGGTCTCATACGAGCCATAGCTTCAG
PJS-P2116	ATACCGCGAGATCCACGCTCACCGGCTCCA
PJS-P2117	TCAGCGGAGATCTTTTGGTTTTGGGAGAGTAG
PJS-P2118	CCCAAAACCAAAAGATCTCCGCTGACTAGGGC
PJS-P2119	CGTTTCACTTTCGGTCTCACAGACGAGTTCCGGAG
PJS-P2120	CGTCTGTGAGACCGAAAGTGAAACGTGATTTCATG
PJS-P2121	GAGTTACGTGAGACCTATAAACGCAGAAAGGCCCA
PJS-P2122	TGCGTTTATAGGTCTCACGTAACTCCGGTGACGGA
PJS-P2123	GGTGAGCGTGGATCTCGCGGTATCATTGCA
PJS-P2124	GCGTGTTACAACCAATTAACCAATTCT
PJS-P2125	TGAGGTCTCATACGAGCCATA
PJS-P2243	GTTTCCCTGGATTGAGACAG
PJS-P2244	CTTGCACTGCAGAAGGGATC
PJS-P2245	AATCAAGAGGTATGTGAGAT
PJS-P2246	CTGTCTCAATCCAGGGAAACGCGTCTGAGATGGAGGATGCGTTTGCAGTAGTGC
PJS-P2247	TGCTGCCTCCGTGACCCGCGTAGACTCCGAAAAAATGGC
PJS-P2248	CGCGGGTCACGGAGGCAGCAAAGTGGCAGATTACTGTCG
PJS-P2249	ACAATTCGCTACTACAATGT
PJS-P2250	CGTGACCCGCGTAGACTCCGAAAAAATGGC
PJS-P2251	TCGGAGTCTACGCGGGTCACGGAGGCCACA
PJS-P2330	CATATGCCTTCGGAGTTAACACCAGGTGAACGATCGGAACTAAAAAACTCA
PJS-P2331	ATGCGCGTCGGATGCACGCGCGACTATATCGTCATCAGTGGAATGCCGGCGTCTACATCAACGGAAAGA
PJS-P2332	GGTAACTCGGAGGATGATACTCGTGTTGGTGTTGATACGGTTGTGAAGCTTAATTTG
PJS-P2334	CGATTCGACAAACCACAAACATACCAACCGTTCATCAAATCCTGCTCCGTC
PJS-P2335	AACTCGGAGGATGATACTCGTATGGCTATTGATACGGTTGTGAAGCTTAATTTG
PJS-P2336	CGATTCGACAAACCACAAACATACAATCCGTTCATCAAATCCTGCTCCGTC
PJS-P2337	CTCAGGTGACGTGAGATCCGGCTGCTA
PJS-P2338	GGCATACCTCCCCCGCCGCCAGTCTGCGCGTCT
PJS-P2339	GGCGGCGGGGGAGGTATGCCTTCGGAGTTAACA
PJS-P2340	CGGATCTCACGTCACCTGAGAACCACT
PJS-P2395	GTTTGTGGTTTGTCGAATCG
PJS-P2401	CACACATCAACTCGGTCCAGGAAGCTGTTCATCA
PJS-P2402	CGAGTATCATCCTCCGAGTT
PJS-P2403	TACCATTCGTCAGCCTTTGTTCGCCTCCGATGATAC
PJS-P2404	ACAAAGGCTGACGAATGGTAAATCCGTTACGACGGT
PJS-P2405	GTATCACCAACCATACGAGTATCATCCTCCGA
PJS-P2406	ACTCGTATGGTTGGTGATACGGTTGTGAAGCT
SW-022	CCTCATCAAGATTGCTTTATGCTAGCTCACGTCACCTGAGAACCACTT
SW-023	GCTAGCATAAAGCAATCTTGATGAGGA
SW-024	CAGACAAGCTGTGACCGTCTTCCCGGCGTTCAGGGTAATATATTTTAACCG
SW-025	GCCAGGCGCCTTTATATCATAT
SW-026	CGCTCATCTTGTGCATGAGACTTGCGAAACCCTATGCTCTGT
SW-027	CGGCGGAGGAGTGACCATCCGAATTCGTCGACGAGCTCACGCGTTC
SW-028	TATTAATTTAGTGTGTGTATTTGTGT
SW-029	ATACACACACTAAATTAATAGCGCGCATGAGTAAAGGAGAAGAACTTTT
SW-030	TTTGTATAGTTCATCCATGCCA
SW-035	GGAGAAAATACCGCATCAGGCCGCGGAATGGAAGGTCGGGATGAGC
SW-036	ATAAAGCAGCCGCTACCAAACA
SW-042	TGGTGGGGGTTCATCTGGTGCTAGCATGCCTTCGGGGTTAACACCAG
SW-043	CTCATCAAGATTGCTTTATGAGATCTTCACGTCACCTGAGAACCACTT
SW-422	ACACAAAGATACATACGGGAGGATCCATGCCTTCGGAGTTAACACCAG
SW-423	CCTCATCAAGATTGCTTTATGCTAGCTCACGTCACCTGAGAACCACTTC
SW-646	ACTAAAGGGAACAAAAGCTGGAGCTCCTTGCCAACAGGGAGTTCT
SW-645	CTTCCAGAGTGAATACCATGCGGCCGCTTAGATTAGATTGCTATGCT
PYR1-F108Y-TAT	GACGACGAACGGAGAGTTACCGGATATAGTATCATCGGAGGCGAACATAGG
PYR1-Y120H-CAT	GGAGGCGAACATAGGCTGACGAATCATAAATCCGTTACGACGGTGCATCGG
PYR1-A160G-GGT	TCGGAGGATGATACTCGTATGTTTGGTGATACGGTTGTGAAGCTTAATTTG
pET29B+ backbone_fwd	ACGTACGTGAGATCCGGCTGCTAACAAAG
pET29B+ backbone_rev	TGCTATTCATGGTATATCTCCTTCTTAAAGTTAAACAAAATTATTTC
met-asn-His-MBP-TEV_fwd	GAGATATACCATGAATAGCAGCCATCATCATCATCATCAC
met-asn-His-MBP-TEV_rev	CGCTGCGACCTCCCCCGCCGCCAGTCTG
dN-HAB1_fwd	CGGCGGGGGAGGTCGCAGCGTCTACGAG
dN-HAB1_rev	CAGCCGGATCTCACGTACGTGTTTTAAACTTGC
HABstarR199AD204A	GGAACTGTCTCAATCCAGGGAAACGCGTCTGAGATGGAGGCGGCGTTTGCAGTAAGCCCCCACTTT
PBD_Fw1	GTTGACTGTATCGCCGGAATTC
PBD_Rv1	CACTATAGGGCTCTAGAGTCGAC
PBD_Fw2	CGGAAGAGAGTAGTAACAAAGGT
PBD_Rv2	GAAATTCGCCCGGAATTAGCTTG

## Sheet: Plasmids Used 
Plasmid	Description	Source
pYTK047	Yeast MoClo Toolkit GFP dropout (CamR)	Addgene (Kit #1000000061)
pYTK084	Yeast MoClo Toolkit KanR ColE1 origin	Addgene (Kit #1000000061)
pMAL‐C5G_ccDockerin	Expression of MBP-ccDockerin.	(Kowalsky and Whitehead 2016)
pBD-PYR1-BbvCI	GAL4-DBD–PYR1 fusion expression for Y2H	(Medina-Cucurella et al. 2019)
pJS624	Yeast surface display vector of PYRMANDI (N90S).	(Steiner et al. 2020)
pJS636	E. coli expression of 6×His–ΔN-HAB1 (C186S, C274S) (pET derivative, KanR)	This study
pJS636-MBP	E. coli expression of 6×His–MBP–ΔN-HAB1 (C186S, C274S) (pET derivative, KanR)	This study
pJS637	YSD of PYR1 (H60P, N90S) ;PYR1M	(Steiner et al. 2020)
pJS645	PYR1 cassette for mutagenesis	This study
pJS646	PYR1 cassette acceptor for Y2H	This study
pJS647	PYR1 cassette with BbvCI site	This study
pJS678	E. coli expression of 6×His–MBP–ΔN-HAB1 (C186S, D199A, D204A, C274S) (pET derivative, KanR)	This study
pJS723	E. coli expression of 6×His–MBP–ΔN-HAB1 (C186S, D199A, D204A, S209V, H248S, F260E, C274S, D287K, S292N, S342A, M358I, N377A, R422E, N439S, M483K) (pET derivative, KanR)	This study
pJS724	E. coli expression of 6×His–MBP–ΔN-HAB1 (C186S, D199A, S209V, D243A, H248S, F260E, C274S, D287K, S292N, S342A, M358I, N377A, R422E, N439S, M483K) (pET derivative, KanR)	This study
pJS725	E. coli expression of 6×His–MBP–ΔN-HAB1 (C186S, D199A, D204A, S209V, D287E, S292N, S342A, N377A, N439S) (pET derivative, KanR)	This study
pJS726	E. coli expression of 6×His–MBP–ΔN-HAB1 (C186S, D199A, S209V, D243A, D287E, S292N, S342A, N377A, N439S) (pET derivative, KanR)	This study
pJS753	YSD of PYR1-WIN (K59Q, H60P, N90S, F159A, A160I)	This study
pJS754	YSD of PYR1-JWH-A (K59N, H60P, N90S, Y120H, A160G)	This study
pJS755	6xHis-MBP-PYR1-H60P-N90S (pET derivative, KanR)	This study
pJS756	6xHis-MBP-PYR1-Mandi (pET derivative, KanR)	This study
pJS794	T7-MBP-PYR1-WIN (Y23H, D26G, K59Q, H60P, N90S, F159A, A160I) (pET derivative, KanR)	This study
pJS796	T7-MBP-PYR1-4FB (H60P, N90S, H115Q, Y120G, F159V, A160G) (pET derivative, KanR)	This study
pJS799	T7-His6-MBP-PYR1-diazi (H60P, V81Y, L87M, N90S, F108Y, M158V, F159G, A160V). (pET derivative, KanR)	This study
pRS426	S. cerevisiae/E. coli shuttle vector, 2 micron, URA	ATCC
pSW004	pRS426, TEF1p-SV40-Z4DBD-PYR1-CYC1t, PGK1p-VP64-HAB1-PGK1t	This study
pSW010	p415GPD, HDup-Z4(4)-CYC1core-GFP-CYC1t-HDdown	This study
pSW143	pRS426, TEF1p-SmBit-linker-PYR1-CYC1t, TEF1p-LgBit-linker-HAB1-PGK1t	This study
pIW15	pRS426, PGK1p-GFP-PGK1t	This study
pIW156	p415GPD	(Mumberg, Müller, and Funk 1995)
pACT-HAB1	pACT expressing GAL4 AD-HAB1 for Y2H experiments	Park et al. 2009
pBD-PYR1	pBD plasmid expressing GAL4 BD-PYR1 (wild type) used for Y2H experiments	Park et al. 2009
pET28a-PYR1WIN	pET28a plasmid expressing 6XHis-PYL2WIN (K64Q, F165A, V166I)	This study

## Sheet: gBlocks used 
Name	Sequence
PJS-G0023	CTGTCTCAATCCAGGGAAACGCGTCTGAGATGGAGGCGGCGTTTGCAGTAGTGCCCCACTTTTTAAAGTTACCTATCAAGATGTTGATGGGGGACCACGAGGGGATGAGTCCTTCTCTGACGCACTTAACGGGCCATTTTTTCGGAGTCTACGATGGTCACGGAGGCAGCAAAGTGGCAGATTACTGTCGTGACCGCCTTCACGAAGCCCTGGCCGAAGAGATTGAACGTATTAAAGATGAATTGAGCAAGCGTAACACCGGGGAGGGACGCCAGGTGCAGTGGAAAAAGGTCTTCACCAACTGTTTCCTGACTGTTGATGGAGAGATTGAAGGAAAGATCGGTCGCGCAGTGGTAGGTAGCTCCGACAAGGTGTTGGAAGCGGTCGCGTCAGAAACTG…
PJS-G0024	ACATTGTAGTAGCGAATTGTGGTGATTCACGCGCGGTGCTGTTTCGTGGCAAGGAGGCTATTCCCCTGAGCGTTGACCACAAACCGGACCGTGAGGACGAATATGCCCGCATCGAGGCGGCTGGTGGCAAGGTAATCCAATGGCAGGGTGCGCGCGTATTCGGGGTCCTGGCAATGTCACGTAGCATTGGTGACCGCTATTTGAAACCATACGTTATCCCGGAGCCTGAGGTTACCTTCATGCCCCGCAGTGAAGAAGACGAATGTTTAATTTTGGCCAGTGACGGGCTGTGGGATGTTATGAGCAATCAAGAGGTATGTGAGATCGCCCGTCGTCGTATCTTAATGTGGCACAAGAAAAATGGGGCTCCACCTCTTGCTGAACGCGGCAAAGGGATTG…
PJS-G0025	CTGTCTCAATCCAGGGAAACGCGTCTGAGATGGAGGCGGCGTTTGCAGTAGTGCCCCACTTTTTAAAGTTACCTATCAAGATGTTGATGGGGGACCACGAGGGGATGAGTCCTTCTCTGACGCACTTAACGGGCCATTTTTTCGGAGTCTACGATGGTCACGGAGGCCACAAAGTGGCAGATTACTGTCGTGACCGCCTTCACTTTGCCCTGGCCGAAGAGATTGAACGTATTAAAGATGAATTGAGCAAGCGTAACACCGGGGAGGGACGCCAGGTGCAGTGGGAAAAGGTCTTCACCAACTGTTTCCTGACTGTTGATGGAGAGATTGAAGGAAAGATCGGTCGCGCAGTGGTAGGTAGCTCCGACAAGGTGTTGGAAGCGGTCGCGTCAGAAACTG…
PJS-G0026	ACATTGTAGTAGCGAATTGTGGTGATTCACGCGCGGTGCTGTTTCGTGGCAAGGAGGCTATGCCCCTGAGCGTTGACCACAAACCGGACCGTGAGGACGAATATGCCCGCATCGAGGCGGCTGGTGGCAAGGTAATCCAATGGCAGGGTGCGCGCGTATTCGGGGTCCTGGCAATGTCACGTAGCATTGGTGACCGCTATTTGAAACCATACGTTATCCCGGAGCCTGAGGTTACCTTCATGCCCCGCAGTCGCGAAGACGAATGTTTAATTTTGGCCAGTGACGGGCTGTGGGATGTTATGAGCAATCAAGAGGTATGTGAGAT
SW-G001	ATGCCAAAAAAGAAGAGAAAGGTCTCCCGAGGTGGAGCCGCTGGAGGCACTAGACCGTATGCCTGCCCTGTAGAGTCCTGTGATAGACGTTTTAGCAGACATGCCAACCTTACACGTCACATCAGAATTCACACAGGGCAAAAACCTTTTCAGTGCAGAATTTGTATGAGAAATTTCAGCAGGAATGCGAACCTAGTAAGACATATTAGGACGCACACAGGTTCCCAGAAGCCTTTTCAATGTCGTATCTGTATGCGTAACTTCTCTAGGAAGGCAGACCTGAGAAGGCATATCAGAACGCACACAGGAGAGAAACCATTTGCGTGCGACATCTGCGGTAGGAAGTTCGCCCGTAAAGGCGACTTAAAAAGGCACACAAAGATACATACGGGA
SW-G002	ATGCCAAAAAAGAAGAGAAAGGTCTCCCGAGGTGGAGCCGACGCCCTGGACGATTTCGACTTGGATATGCTTGGTAGTGACGCGCTAGATGATTTTGATTTGGATATGTTAGGATCTGACGCCCTAGACGACTTCGATCTGGATATGCTTGGGTCCGACGCGCTGGATGATTTCGACCTGGACATGTTA
SW-G003	GCACAAGATGAGCGGCGGAGGAGGAAAACGTGCGGCGGAGGAGGTATAGCAGCGGCGGAGGAGTTATCGGAGCGGCGGAGGAGGGTTCTCTGTATCATGTCGAAGTTCGTTATTGGACTCATTCAACAGAAGTAGCGGCGGAGGAGTCACTAGAGCGGCGGAGGAGAGTGTGTTGCGGCGGAGGAGAGCAACTAGCGGCGGAGGAGCAGTGTGCGTAACTTCCTTAGCTGAAGTGCTGGGAACGCTCAATCAAAGACGCGGCGGAGGAGGCTACAAGGCGGCGGAGGAGTAGTGAGAGCGGCGGAGGAGCATACAAGGCGGCGGAGGAGATCGTTGGTGCATCATCCAGTGCGGCGGAGGAGATCAGCGGCGGAGGAGTTCAGCGGCGGAGGAGACAAG…
SW-G004	CATAGCAATCTAATCTAAGCCTAGGATGGTGACCGGCTACCGGCTGTTCGAGGAGATTCTCGGGAGTTCCGGTGGTGGCGGGAGCGGAGGTGGAGGCTCGAGCGGTGCTA
SW-G005	ACCGCTCGAGCCTCCACCTCCGCTCCCGCCACCACCGGAACTCCCACTGTTGATGGTTACTCGGAACAGCATGGAGCCGTCGGGGGTGATCAGGCGCTCGTCGATAATTTTGTTGCCGTTCCACAGGGTCCCTGTTACAGTGATCTTTTTGCCGTCGAACACGGCGATGCCTTCATACGGCCGTCCGAAATAGTTCAGCATGTTCGGCGTAACCCCGTCGATTACCAGTGTGCCATAGGGCAGGATCACCTTAAAGTGATGATCATCCACAGGGTACACCACCTTAAACACCTCTTCGATCTGGGCCATTTGGTCGGCGCTCAGACCTTCATACGGGATGATGACATGGATGTCGATCTTCAGGGCATTTTCACCGCTCCGGACAATCCTTTGGATCGG…

[truncated: 1 more sheets: Sensor sequences]
