# Supplementary material for: Rapid biosensor development using plant hormone receptors as reprogrammable scaffolds
Source: Nat Biotechnol. 2022 Jun 20;40(12):1855–61. doi: 10.1038/s41587-022-01364-5 (PMC9750858; doi:10.1038/s41587-022-01364-5)
Supplement: Supplementary file 4 — Sequences of cannabinoid sensors. [file 41587_2022_1364_MOESM4_ESM.xlsx]

## Sheet: Evolved sensor sequences and ch
Sensor name	Target ligand	Library		Mutations present																					Y2H response - nM								Min. response (nM)
				E4	Y23	D26	Y58	K59	V81	V83	L87	A89	E102	H115	Y120	E141	M158	F159	A160	V164	Q169	D184	V190		5	10	25	50	100	10ʌ3	10ʌ4	10ʌ5
1	JWH-193	CB-S1													G			V	G													(+)	25000
2	JWH-193	CB-S3									M	V	K		G			V	G												(+)	(+)	10000
3	WIN 55,212	DSM																G	V												(+)	(+)	10004
4	WIN 55,212	DSM																S	L												(+)	(+)	10000
5	WIN 55,212	DSM																G	I												(+)	(+)	10000
6	WIN 55,212	DSM																S	V												(+)	(+)	10000
7	WIN 55,212	DSM																T	L											(+)	(+)	(+)	1000
8	WIN 55,212	CB-S1						Q										A	I									(+)	(+)	(+)	(+)	(+)	50
9	WIN 55,212	CB-S1						Q										A	I		R							(+)	(+)	(+)	(+)	(+)	50
10	WIN 55,212	CB-S1			H	G		Q										A	I									(+)	(+)	(+)	(+)	(+)	50
PYR1 WIN	WIN 55,212	CB-S2		G	H	G		Q										A	I							(+)	(+)	(+)	(+)	(+)	(+)	(+)	10
12	JWH-015	DSM																A		H												(+)	25000
13	JWH-015	DSM													G				G												(+)	(+)	10000
14	JWH-015	DSM													H				G												(+)	(+)	10000
15	JWH-015	DSM													A				G												(+)	(+)	10000
16	JWH-015	DSM																A	I											(+)	(+)	(+)	1000
17	JWH-015	CB-S1						N							H				G										(+)	(+)	(+)	(+)	50
PYR1 JWH-015	JWH-015	CB-S2						N							H			L	G								(+)	(+)	(+)	(+)	(+)	(+)	25
19	JWH-072	DSM													G				G												(+)	(+)	10000
20	JWH-072	DSM													H				G												(+)	(+)	10000
21	JWH-072	DSM						T							G				G												(+)	(+)	10000
22	JWH-072	DSM													A				G											(+)	(+)	(+)	1000
23	JWH-072	CB-S1						N							H				G									(+)	(+)	(+)	(+)	(+)	50
PYR1 JWH-072	JWH-072	CB-S2		G				N							H			L	G							(+)	(+)	(+)	(+)	(+)	(+)	(+)	10
25	JWH-018	DSM													G				G												(+)	(+)	10000
PYR1 JWH-018	JWH-018	CB-S1													G		I		G											(+)	(+)	(+)	1000
27	JWH-007	CB-S1						S		W					G			A														(+)	25000
28	JWH-007	CB-S3								W					G			A	I											(+)	(+)	(+)	1000
29	JWH-016	DSM													A				G											(+)	(+)	(+)	1000
30	JWH-016	CB-S1							I						G				G									(+)	(+)	(+)	(+)	(+)	50
PYR1 JWH-016	JWH-016	CB-S2							I						G			L	G							(+)	(+)	(+)	(+)	(+)	(+)	(+)	10
32	JWH-030	DSM													A				G													(+)	25000
PYR1 JWH-030	JWH-030	DSM													G				G													(+)	25000
34	JWH-167	CB-S1													G			L	G													(+)	25000
35	JWH-167	CB-S3						S		W				Q	G			L	G									(+)	(+)	(+)	(+)	(+)	50
PYR1 JWH-167	JWH-167	CB-S3					F		M	F				Q	G			L	G			G					(+)	(+)	(+)	(+)	(+)	(+)	25
PYR1 4F	4F-MDMB-BUTINACA	CB-S3												Q	G			V	G								(+)	(+)	(+)	(+)	(+)	(+)	25
38	AB-PINACA	CB-S1													G			V	G													(+)	25000
PYR1 AB-PINACA	AB-PINACA	CB-S3												Q	G			V	G											(+)	(+)	(+)	1000
40	(±)-CP 47,497	DSM						A		L						F															(+)	(+)	10000
41	∆9-THC	CBS-1		G										Q	G				G													(+)	25000
PYR1 ∆9-THC	∆9-THC	CBS-4		G				R						Q	G																(+)	(+)
42	CBDA	CB-S3		G				R						Q	G	M																(+)	25000
43	CBDA	CB-S3						R						Q	G					W			A							(+)	(+)	(+)	1000
PYR1 CBDA	CBDA	CB-S4						R						Q	G	M				W									(+)	(+)	(+)	(+)
