# Supplementary material for: Rapid biosensor development using plant hormone receptors as reprogrammable scaffolds
Source: Nat Biotechnol. 2022 Jun 20;40(12):1855–61. doi: 10.1038/s41587-022-01364-5 (PMC9750858; doi:10.1038/s41587-022-01364-5)
Supplement: Supplementary file 5 — Sequences of organophosphate sensors. [file 41587_2022_1364_MOESM5_ESM.xlsx]

## Sheet: DMC & K59R library screens and 
Chemical	Library	Sensor name																										Y2H response - nM
				E8	S16	S29	Q36	K59	V81	L87	S92	F108	I110	Y120	N119	S122	E130	I135	D154	M158	F159	A160	T162	V163	N167	V174		5	10	25	50	100	10ʌ3	10ʌ4	10ʌ5
Diazinon	DMC									P				A																				(+)	(+)
Diazinon	DMC													A							T														(+)
Diazinon	DMC									M											G														(+)
Diazinon	DMC											Y									G													(+)	(+)
Dimethoate	DMC																								G										(+)
Pirimiphos-methyl	DMC													A							L													(+)	(+)
Pirimiphos-methyl	DMC													A							T													(+)	(+)
Chlorfenvinphos	K59R							R				A																						(+)	(+)
Chlorfenvinphos	K59R							R													L														(+)
Chlorfenvinphos	K59R							R										R					W											(+)	(+)
Diazinon	K59R							R						A																					(+)
Dimethoate	K59R							R												T														(+)	(+)
Dimethoate	K59R							R												V															(+)
Pirimiphos-methyl	K59R							R													T													(+)	(+)
Pirimiphos-methyl	K59R							R													C													(+)	(+)
Pirimiphos-methyl	K59R							R													I													(+)	(+)
Diazinon	OPs Shuffle 1											Y							G		G	V											(+)	(+)	(+)
Pirimiphos-methyl	OPs Shuffle 1				P	G	R	R			M										T												(+)	(+)	(+)
Diazinon	OPs Shuffle 2									M		Y									G	V									(+)	(+)	(+)	(+)	(+)
Pirimiphos-methyl	OPs Shuffle 2							R			M										T					A						(+)	(+)	(+)	(+)
Diazinon	OPs Shuffle 3								Y	M		Y									G	V							(+)	(+)	(+)	(+)	(+)	(+)	(+)
Pirimiphos-methyl	OPs Shuffle 3							R			M					Q	G				T					A				(+)	(+)	(+)	(+)	(+)	(+)
Diazinon	OPs Shuffle 4	PYR1 DIAZI		G					Y	M		Y								V	G	V						(+)	(+)	(+)	(+)	(+)	(+)	(+)	(+)
Pirimiphos-methyl	OPs Shuffle 4	PYR1 PIRI						R			M				S	Q	G				T	T				A			(+)	(+)	(+)	(+)	(+)	(+)	(+)
Diazinon	DSM																				G	V													(+)
Diazinon	DSM																				G	I													(+)
Pirimiphos-methyl	DSM													A							A													(+)	(+)
Pirimiphos-methyl	DSM												A								I													(+)	(+)
Chlorfenvinphos	DSM												A								L														(+)
Chlorfenvinphos	DSM							R				L									L														(+)
Dimethoate	DSM															G									G										(+)
Dimethoate	DSM								L																G										(+)
Disulfoton	DSM									M				H																					(+)
Disulfoton	DSM							N													L														(+)
Parathion-methyl	DSM													L		N																			(+)
Azinphos-ethyl	DSM													A										W											(+)

## Sheet: DSM screen hits (100 uM)
Ligand	Library screened	K59	V81	V83	L87	F108	I110	Y120	S122	F159	A160	V163	V164	N167
Pirimiphos-methyl	DSM									I			I
Pirimiphos-methyl	DSM									T			H
Pirimiphos-methyl	DSM									I	N
Pirimiphos-methyl	DSM							A		A
Pirimiphos-methyl	DSM	R								L
Pirimiphos-methyl	DSM						A			I
Pirimiphos-methyl	DSM							A		T
Diazinon	DSM									L	I
Diazinon	DSM									G	V
Diazinon	DSM									G	I
Diazinon	DSM	M		M				A
Diazinon	DSM			M				A
Diazinon	DSM					Y		A
Chlorfenvinphos	DSM						A			G
Chlorfenvinphos	DSM	R				L				L
Chlorfenvinphos	DSM						A			L				I
Chlorfenvinphos	DSM	R		I						L
Chlorfenvinphos	DSM	R				A
Dimethoate	DSM									H				G
Dimethoate	DSM								G					G
Dimethoate	DSM					W								G
Dimethoate	DSM		L											G
Dimethoate	DSM				I									G
Parathion-methyl	DSM							L	N
Azinphos-ethyl	DSM							A				W
Disulfuton	DSM									A	L
Disulfuton	DSM				M			H
Disulfuton	DSM	N								L
